# Supplementary material
Source: MDPI journal article supplement (https://www.mdpi.com/2076-3417/12/15/7426)
Supplement: s1 [file s1 › applsci-1785540-supplementary.pdf]

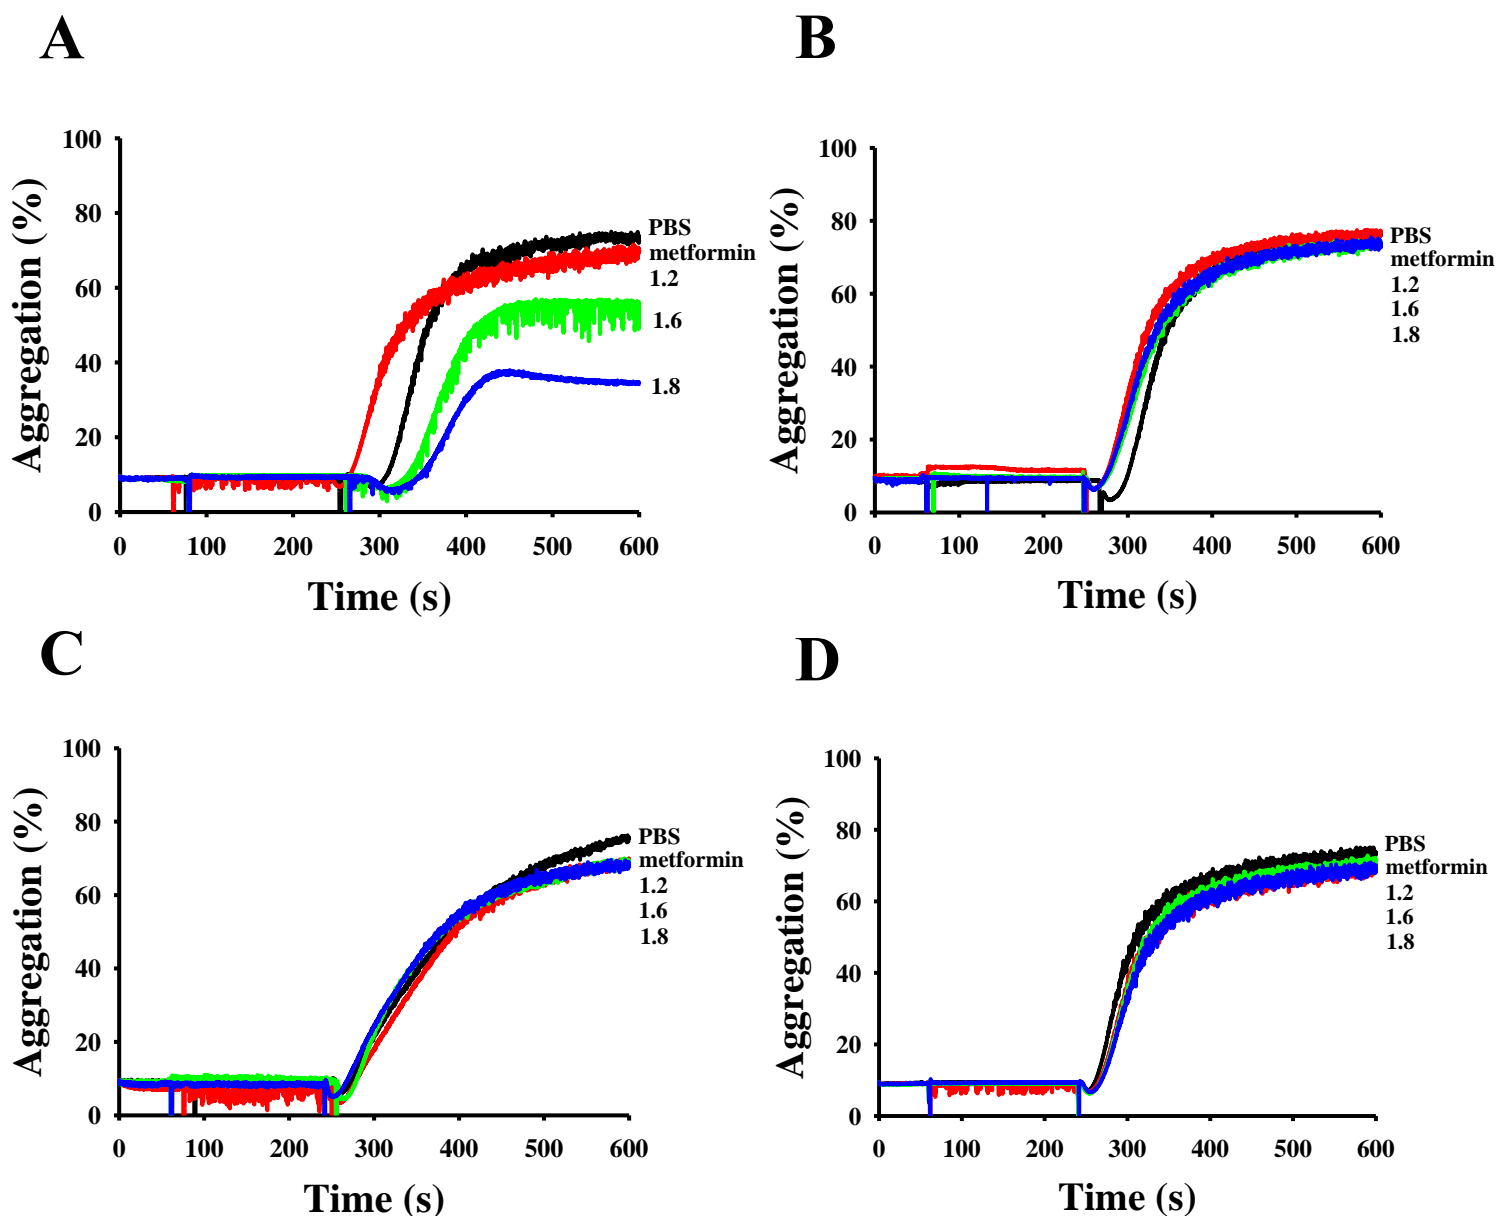

**Figure S1.** Inhibitory curves of metformin in platelet aggregation stimulated by various agonists. Washed human platelets ( $3.6 \times 10^8$  cells/mL) were preincubated with a solvent control (PBS, black line) or metformin (1.2 mM, red line; 1.6 mM, green line; 1.8 mM, blue line) and subsequently treated with (A) collagen (1  $\mu$ g/mL), (B) thrombin (0.05 U/mL), (C) U46619 (1  $\mu$ M), or (D) arachidonic acid (AA; 60  $\mu$ M) to stimulate platelet aggregation. The data are the representative of four independent experiments.

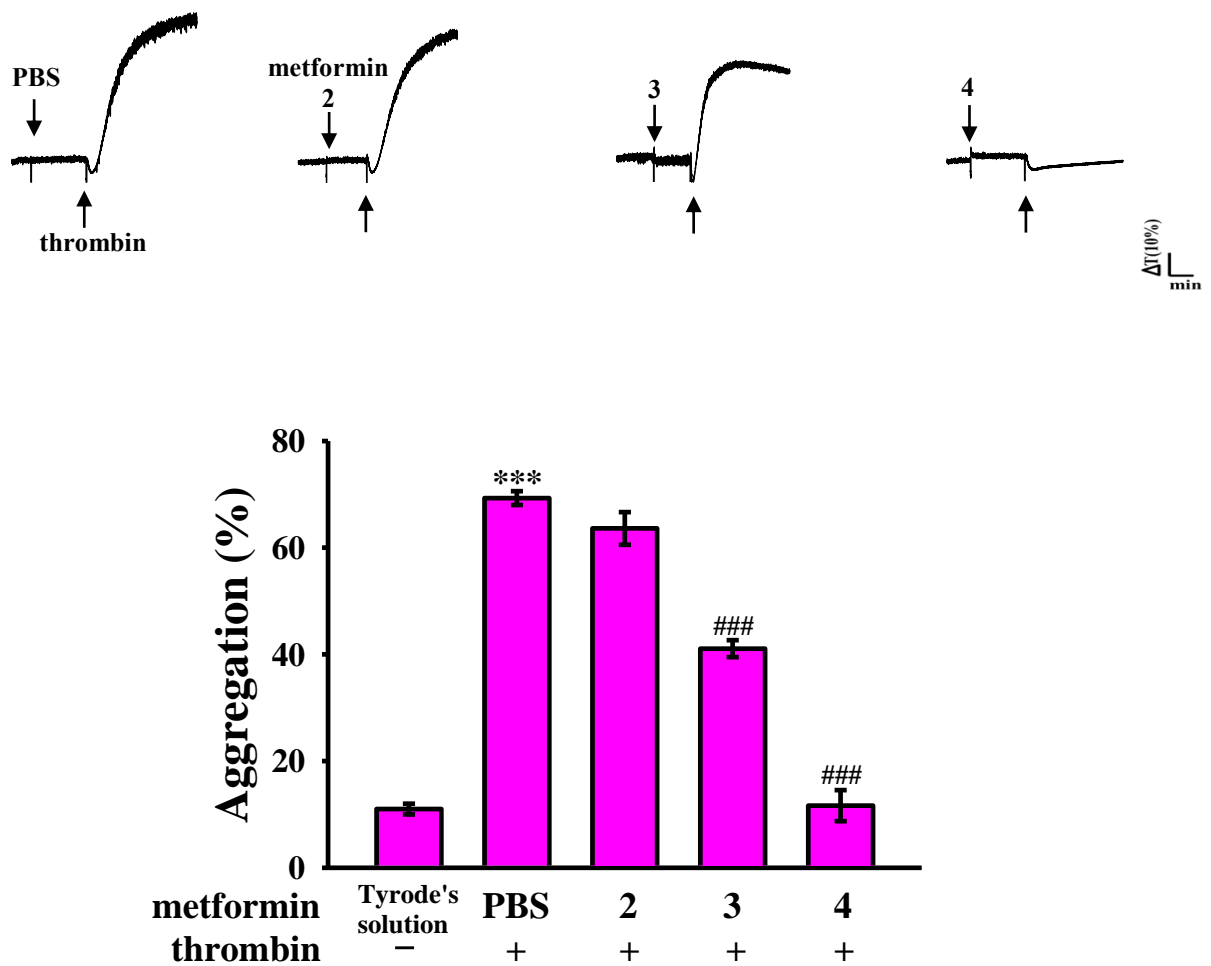

**Figure S2.** Inhibitory activity of metformin in thrombin-induced platelet aggregation. Washed human platelets ( $3.6 \times 10^8$  cells/mL) were preincubated with a solvent control (PBS) or metformin (2–4 mM) and subsequently treated with thrombin (0.05 U/mL) to stimulate platelet aggregation. The corresponding statistical data is displayed in the below panel. Data are expressed as mean  $\pm$  standard error of the mean (n=4). \*\*\* $p < 0.001$  vs Tyrode's solution; ### $p < 0.001$  vs PBS + thrombin group.
